# Supplementary material for: ZEB1 Regulates Multiple Oncogenic Components Involved in Uveal Melanoma Progression
Source: PubMed Central journal article supplement (PMC5428321; doi:10.1038/s41598-017-00079-x), 2017-03-03
Supplement: 41598_2017_79_MOESM1_ESM.pdf [file 41598_2017_79_MOESM1_ESM.pdf]

## **ZEB1 Regulates Multiple Oncogenic Components Involved in Uveal Melanoma Progression**

Yao Chen, Xiaoqin Lu, Diego E. Montoya-Durango, Yu-Hua Liu, Kevin C. Dean, Douglas S. Darling, Henry J. Kaplan, Douglas C. Dean, Ling Gao, Yongqing Liu

**Supplemental Table 1. Human ZEB1 interference target sequence information**

| <b>ID</b>           | <b>Target sequence (5'-3')</b> | <b>Start site</b> | <b>GC content (%)</b> |
|---------------------|--------------------------------|-------------------|-----------------------|
| ZEB1-RNAi (22902-1) | TGTTGTTCTGCCAACAGTT            | 1201              | 42.11                 |
| ZEB1-RNAi (22904-1) | GCGCAATAACGTTACAAAT            | 70                | 36.84                 |
| ZEB1-RNAi (22905-1) | AACAATACAAGAGGTAAA             | 3706              | 26.32                 |
| ZEB1-RNAi (22906-1) | TGCCAATAAGCAAACGATT            | 2512              | 36.84                 |
| Scramble control    | CAACAAGATGAAGAGCACCAA          | N/A               | 40.90                 |

**Supplementary Table 2. Primers used for real-time quantitative PCR**

| Primer name  | Sequence (5' - 3')     | Tm °C | Amplicon (bp) |
|--------------|------------------------|-------|---------------|
| Hs ACTB LP   | GGACTTCGAGCAAGAGATGG   | 55.3  | 234           |
| Hs ACTB RP   | AGCACTGTGTTGGCGTACAG   | 57.9  |               |
| Hs BAP1 LP   | AAGCCTCATTTGCAAAGCCA   | 55.9  | 195           |
| Hs BAP1 RP   | GGTGCTGTCTCTCTCCTC     | 56.5  |               |
| Hs CDH1 LP   | TTTCCACCAAAGTCACGCTG   | 55.9  | 162           |
| Hs CDH1 RP   | GGCAGCTGATGGGAGGAATA   | 56.8  |               |
| Hs CDH2 LP   | ACAGTGGCCACCTACAAAGG   | 57.4  | 201           |
| Hs CDH2 RP   | CCGAGATGGGGTTGATAATG   | 52.9  |               |
| Hs CDKN1A LP | CAGCAGAGGAAGACCATGTG   | 55.6  | 153           |
| Hs CDKN1A RP | GGCGTTTGAGTGGTAGAAA    | 55.2  |               |
| Hs CDKN1B LP | CCGGCTAACTCTGAGGACAC   | 56.2  | 221           |
| Hs CDKN1B RP | CTTCTGAGGCCAGGCTTCTT   | 55.1  |               |
| Hs CDKN2A LP | AGGGTTTTCGTGGTTCACAT   | 55.2  | 150           |
| Hs CDKN2A RP | CTGCCATCATCATGACCT     | 56.7  |               |
| Hs CDKN2B LP | GGTGAGAGTGGCAGGGTCT    | 56.3  | 174           |
| Hs CDKN2B RP | CGGGGACTAGTGGAGAAGGT   | 56.7  |               |
| Hs CDKN2C LP | GGGCAGGTTCCCTTCATTAT   | 55.4  | 223           |
| Hs CDKN2C RP | TGCACAAAATGGATTTGGAA   | 56.1  |               |
| Hs CDKN2D LP | ATGCTGCTGGAGGAGGTTC    | 57.6  | 158           |
| Hs CDKN2D RP | CTGCCAAACATCATGACCTG   | 56.2  |               |
| Hs FN1 LP    | GCAACGATCAGGACACAAGGAC | 58.2  | 207           |
| Hs FN1 RP    | GGTGAGGCTGCGGTTGGTAA   | 60.2  |               |
| Hs ID2 LP    | CGCATCCCCTATTGTCAGC    | 56.1  | 155           |
| Hs ID2 RP    | CAGTGCTTTGCTGTCATTTGA  | 54    |               |
| Hs MITF LP   | AACTCATGCGTGAGCAGATG   | 55.5  | 202           |
| Hs MITF RP   | TACTTGGTGGGGTTTTTCGAG  | 54.7  |               |
| Hs MMP1 LP   | ATGCTGAAACCCTGAAGGTG   | 56.2  | 234           |
| Hs MMP1 RP   | CTGCTTGACCCTCAGAGACC   | 55.7  |               |
| Hs MMP11 LP  | GCAACCGACAGAAGAGGTTC   | 55.9  | 135           |
| Hs MMP11 RP  | ATACCTTTAGGGCCTCTGCC   | 56.6  |               |
| Hs MMP3 LP   | AAGTGGAGGAAAACCCACCT   | 54.1  | 215           |
| Hs MMP3 RP   | TTTCCAGGTCCATCAAAAGG   | 55    |               |
| Hs PFN1 LP   | GTGGAACGCCTACATCGACAAC | 58.2  | 154           |
| Hs PFN1 RP   | TTTGCCAACCAGGACACCCA   | 59.8  |               |
| Hs PLAU LP   | TCACCACAAAATGCTGTGT    | 55.2  | 223           |
| Hs PLAU RP   | AGGCCATTCTCTCCTTGGT    | 56.2  |               |
| Hs SNAI1 LP  | GAAAGGCCTTCAACTGCAAA   | 55.3  | 249           |
| Hs SNAI1 RP  | TGACATCTGAGTGGGTCTGG   | 56.1  |               |
| Hs SNAI2 LP  | TCGGACCCACACATTACCTT   | 55.2  | 210           |
| Hs SNAI2 RP  | TTGGAGCAGTTTTTGCCTG    | 54.6  |               |
| Hs TWIST1 LP | CTCGGTCTGGAGGATGGAG    | 56.7  | 228           |
| Hs TWIST1 RP | CCACGCCCTGTTTCTTTGAA   | 56    |               |
| Hs TWIST2 LP | TACAGCAAGAAGTCGAGCGA   | 56    | 207           |
| Hs TWIST2 RP | CTTGCTCAGCTTGTGAGAGG   | 55.7  |               |
| Hs TYR LP    | ATTGATTTTGCCCATGAAGC   | 51.9  | 251           |
| Hs TYR RP    | TCCTCCAATCGGCTACAGAC   | 56.3  |               |
| Hs TYRP1 LP  | CCTTGCGCTTCTTCAATAGG   | 53.8  | 245           |

|             |                         |      |     |
|-------------|-------------------------|------|-----|
| Hs TYRP1 RP | TGGCCCCAGTATTTCTTCTG    | 54.6 |     |
| Hs Vim LP   | CGAGGAGAGCAGGATTTCTC    | 54.8 | 91  |
| Hs Vim RP   | GGTATCAACCAGAGGGAGTGA   | 55.8 |     |
| Hs ZEB1 LP  | CTACAACAACAAGACTGCTGT   | 55.4 | 176 |
| Hs ZEB1 RP  | TGTTCTTTCAGAGAGGTAAAGCG | 54.8 |     |
| Hs ZEB2 LP  | CAAGAGGCGCAAACAAGCC     | 57.7 | 128 |
| Hs ZEB2 RP  | GGTTGGCAATACCGTCATCC    | 56.2 |     |

**Supplementary Table 3. Primers used for ChIP assays**

| Primer name       | Sequence (5' - 3')       | Tm °C | Amplicon (bp) |
|-------------------|--------------------------|-------|---------------|
| Hs CDH1 PRMT LP   | TAGAGGGTCACCGCGTCTAT     | 57.3  | 200           |
| Hs CDH1 PRMT RP   | TCACAGGTGCTTTGCAGTTC     | 55.9  |               |
| Hs CDH2 PRMT LP   | TCCCCACCATTCTTCATCTC     | 54.1  | 147           |
| Hs CDH2 PRMT RP   | CGGAGGGAAGCCTAGAGTG      | 57    |               |
| Hs GAPDH PRMT LP  | TACTAGCGGTTTTACGGGCG     | 57.2  | 166           |
| Hs GAPDH PRMT RP  | TCGAACAGGAGGAGCAGAGAGCGA | 63.3  |               |
| Hs FN1 PRMT LP    | AAAGAAAGGGAGCGGGATGGG    | 59.7  | 190           |
| Hs FN1 PRMT RP    | GGGTGGTGGTAGTGTTGAGGA    | 58.9  |               |
| Hs ID2 PRMT LP    | CGCCAGCCCCGCACTTACTG     | 63.7  | 268           |
| Hs ID2 PRMT RP    | GGCGGAAGGTGGCAGTCTA      | 62.2  |               |
| Hs MITF PRMT LP   | CCAGGCATGAACACACATTC     | 54.3  | 185           |
| Hs MITF PRMT RP   | GGCAGACCTTGGTTCCATA      | 54.8  |               |
| Hs MMP11 PRMT LP  | ATGGAACAATCTCGGCTCAC     | 55    | 177           |
| Hs MMP11 PRMT RP  | AGGTCAGGAGTTGGAGAGCA     | 57.9  |               |
| Hs CDKN1A PRMT LP | TATTAGCTGGGCATGGTGGT     | 56.3  | 177           |
| Hs CDKN1A PRMT RP | GCAGCCCTGGCTTTTTGTTT     | 57.2  |               |
| Hs PFN1 PRMT LP   | TTCCTCCTGCTTCTCCTCCT     | 57.8  | 217           |
| Hs PFN1 PRMT RP   | CAGCCCAGACACCGAACTTTG    | 58.6  |               |
| Hs PLAU PRMT LP   | ATATCTGGGGACTGCCACTG     | 56.5  | 170           |
| Hs PLAU PRMT RP   | CCAACCTGCCTAAGACTGCC     | 56.1  |               |
| Hs SNAI1 PRMT LP  | CACCAAAGCACACTTCCCTT     | 55.8  | 186           |
| Hs SNAI1 PRMT RP  | CACCCGTTCTTCCCTTATC      | 55.1  |               |
| Hs SNAI2 PRMT LP  | ATTTGGTCTTTGTGCAAGGC     | 54.3  | 211           |
| Hs SNAI2 PRMT RP  | CTCTCTGGGAGCTAGGAGGG     | 58.3  |               |
| Hs TWIST1 PRMT LP | CACAATGCGGAGCCTAATTT     | 53.6  | 161           |
| Hs TWIST1 PRMT RP | CACTCTTCGGTGGAAAGGAAA    | 54.6  |               |
| Hs ZEB2 PRMT LP   | CTCCCTACACACTCTCCCTT     | 55.5  | 197           |
| Hs ZEB2 PRMT RP   | AGCTGCATCTTAGGGCATGT     | 56.8  |               |

Supplemental Table 4. Patients' information associated with the GSE22138 data set

| UM #                   | age          | gender | eye   | tumor location           | tumor diameter | tumor thickness (mm) | tumor cell type | retinal detachment | extrac scleral extension | chromosome 3 status | months to endpoint | metastasis  | ZEB1         |
|------------------------|--------------|--------|-------|--------------------------|----------------|----------------------|-----------------|--------------------|--------------------------|---------------------|--------------------|-------------|--------------|
| <b>ZEB1 high group</b> |              |        |       |                          |                |                      |                 |                    |                          |                     |                    |             |              |
| MU151                  | 47.43        | female | right | posterior and on equator | 17             | 13.5                 | NA              | yes                | NA                       | rtial monosor       | 52.57              | yes         | 157.248      |
| MU6                    | 46.4         | male   | right | posterior to equator     | 15             | 14                   | mixed           | yes                | yes                      | disomy              | 64                 | yes         | 156.305      |
| MU175                  | 53.07        | female | right | posterior to equator     | 16             | 6                    | NA              | NA                 | yes                      | monosomy            | 68.37              | yes         | 150.686      |
| MU152                  | 78.98        | male   | left  | NA                       | NA             | 11.1                 | epithelioid     | no                 | no                       | monosomy            | 39.69              | no          | 98.5651      |
| MU86                   | 75.75        | female | right | posterior and on equator | 12             | 10                   | epithelioid     | yes                | NA                       | monosomy            | 8.67               | yes         | 94.5485      |
| MU131                  | 55.68        | female | left  | on equator               | 18             | 11.7                 | epithelioid     | yes                | no                       | monosomy            | 27.3               | yes         | 78.7187      |
| MU185                  | 48.46        | male   | left  | on equator               | 12             | 10.5                 | NA              | yes                | no                       | monosomy            | 14.95              | yes         | 77.0308      |
| MU164                  | 62.88        | male   | left  | on equator               | NA             | 11.5                 | epithelioid     | no                 | no                       | monosomy            | 12.88              | yes         | 71.5672      |
| MU8                    | 84.99        | male   | right | anterior to equator      | 20             | 7                    | NA              | no                 | NA                       | monosomy            | 67.81              | no          | 67.5097      |
| MU40                   | 54.81        | female | left  | on equator               | 13             | 12.7                 | mixed           | yes                | yes                      | monosomy            | 0.92               | yes         | 62.9913      |
| MU215                  | 64.55        | male   | left  | on equator               | 10             | 15                   | mixed           | yes                | no                       | monosomy            | 14.85              | yes         | 56.6534      |
| MU11                   | 59.1         | male   | right | on equator               | 20.9           | 10.5                 | epithelioid     | yes                | no                       | monosomy            | 6.14               | yes         | 56.4684      |
| MU166                  | 54.41        | female | left  | on equator               | 10             | 9.3                  | epithelioid     | yes                | no                       | monosomy            | 0.13               | yes         | 53.8595      |
| MU167                  | 77.68        | female | right | anterior to equator      | 11             | 11.8                 | epithelioid     | no                 | no                       | monosomy            | 24.44              | yes         | 48.9174      |
| MU109                  | 63.03        | male   | right | anterior to equator      | 10             | 11                   | epithelioid     | no                 | no                       | monosomy            | 24.54              | yes         | 45.4974      |
| MU110                  | 65.2         | male   | right | on equator               | NA             | 12.8                 | mixed           | yes                | no                       | rtial monosor       | 35.78              | yes         | 45.4974      |
| MU3                    | 67.57        | male   | left  | on equator               | 10             | 11.3                 | epithelioid     | NA                 | NA                       | NA                  | 32.13              | yes         | 43.3136      |
| MU210                  | 70.26        | male   | right | on equator               | 15             | 13                   | mixed           | yes                | no                       | disomy              | 6.18               | yes         | 43.2109      |
| MU66                   | 65.62        | male   | right | on equator               | 16             | 13                   | NA              | yes                | no                       | monosomy            | 14.16              | no          | 40.1843      |
| MU207                  | 50.17        | male   | right | on equator               | 10             | 9                    | epithelioid     | yes                | no                       | disomy              | 31.18              | no          | 37.3749      |
| MU212                  | 50.17        | male   | left  | on equator               | 19.6           | 13.6                 | epithelioid     | yes                | no                       | monosomy            | 17.61              | yes         | 35.7135      |
| <b>Average</b>         | <b>61.72</b> |        |       | <b>0.48</b>              | <b>14.19</b>   | <b>11.35</b>         | <b>0.84</b>     | <b>0.74</b>        | <b>0.18</b>              | <b>0.80</b>         | <b>26.87</b>       | <b>0.81</b> | <b>72.47</b> |
| <b>ZEB1 low group</b>  |              |        |       |                          |                |                      |                 |                    |                          |                     |                    |             |              |
| MU62                   | 66.2         | female | right | NA                       | 9              | 8.9                  | mixed           | no                 | NA                       | NA                  | 120.64             | no          | 33.9489      |
| MU44                   | 75.66        | male   | left  | on equator               | 15             | 12.4                 | NA              | yes                | no                       | NA                  | 6.54               | yes         | 32.778       |
| MU65                   | 68.51        | male   | left  | NA                       | 10             | 8.9                  | NA              | yes                | no                       | monosomy            | 60.06              | no          | 31.5272      |
| MU211                  | 80.66        | male   | left  | on equator               | 18             | 11                   | NA              | no                 | no                       | monosomy            | 9.3                | no          | 31.0561      |
| MU206                  | 69.05        | male   | right | posterior to equator     | NA             | 13                   | epithelioid     | NA                 | no                       | monosomy            | 8.34               | yes         | 26.4749      |
| MU197                  | 56.33        | male   | right | posterior to equator     | NA             | 9.9                  | epithelioid     | yes                | n                        | monosomy            | 7.33               | yes         | 25.8678      |
| MU67                   | 47.62        | female | left  | on equator               | 17             | 9.7                  | mixed           | yes                | no                       | disomy              | 67.98              | no          | 25.826       |
| MU107                  | 62.62        | male   | left  | on equator               | 13             | 13                   | mixed           | no                 | no                       | monosomy            | 100.4              | no          | 25.4691      |
| MU1                    | 76.54        | female | right | NA                       | NA             | 12.2                 | mixed           | no                 | NA                       | NA                  | 73                 | no          | 23.0124      |
| MU213                  | 66.26        | male   | left  | on equator               | 15             | 10.5                 | epithelioid     | NA                 | no                       | disomy              | 31.74              | no          | 22.6956      |
| MU174                  | 72.79        | male   | left  | on equator               | 20             | 12.4                 | epithelioid     | no                 | no                       | monosomy            | 67.75              | no          | 19.4268      |
| MU208                  | 56.25        | female | right | on equator               | 15             | 11                   | epithelioid     | yes                | no                       | disomy              | 67.38              | no          | 17.7128      |
| MU9                    | 50.64        | female | left  | on equator               | NA             | 8.3                  | mixed           | yes                | no                       | disomy              | 86.08              | no          | 17.4965      |
| MU38                   | 60.8         | male   | left  | posterior to equator     | 15             | 7.5                  | mixed           | yes                | NA                       | NA                  | 16.76              | yes         | 16.3265      |
| MU12                   | 52.33        | male   | left  | on equator               | 19.4           | 13.7                 | mixed           | yes                | no                       | disomy              | 55.79              | no          | 15.3068      |
| MU173                  | 56.17        | female | left  | on equator               | 19             | 12                   | NA              | no                 | no                       | disomy              | 62.69              | no          | 15.0328      |
| MU195                  | 62.12        | male   | left  | posterior to equator     | NA             | 17                   | mixed           | yes                | no                       | monosomy            | 18.89              | yes         | 14.51        |
| MU216                  | 60.35        | male   | left  | on equator               | 16             | 12.5                 | NA              | yes                | yes                      | disomy              | 36.9               | yes         | 14.4937      |
| MU47                   | 45.97        | male   | right | on equator               | 9              | 10.4                 | mixed           | yes                | no                       | rtial monosor       | 89.82              | no          | 14.4523      |
| MU87                   | 67.46        | female | left  | on equator               | 18             | 11.7                 | NA              | yes                | no                       | monosomy            | 49.02              | yes         | 14.4196      |
| MU209                  | 82.79        | female | right | on equator               | 17             | 13.2                 | NA              | no                 | no                       | monosomy            | 31.54              | no          | 14.2763      |
| MU214                  | 56.1         | female | left  | on equator               | 12             | 13.7                 | epithelioid     | yes                | no                       | monosomy            | 50.46              | no          | 14.2359      |
| MU130                  | 57.69        | male   | left  | posterior to equator     | 16             | 10.5                 | NA              | yes                | no                       | disomy              | 93.73              | no          | 13.9956      |
| MU10                   | 38.67        | male   | right | on equator               | 11             | 10                   | NA              | yes                | no                       | disomy              | 85.09              | no          | 13.701       |
| MU4                    | 61.82        | male   | right | on equator               | 20             | 10.9                 | NA              | yes                | NA                       | NA                  | 0.39               | yes         | 13.3754      |
| MU111                  | 40.31        | male   | right | on equator               | 18             | 11                   | NA              | yes                | no                       | disomy              | 55.75              | no          | 13.1327      |
| MU192                  | 68.83        | female | right | posterior and on equator | 11             | 11.5                 | epithelioid     | yes                | no                       | NA                  | 58.74              | yes         | 12.1026      |
| MU108                  | 51.91        | female | right | posterior to equator     | 15             | 11                   | mixed           | no                 | no                       | rtial monosor       | 85.82              | no          | 11.7344      |
| MU89                   | 72.29        | male   | left  | NA                       | 22             | 14                   | epithelioid     | yes                | no                       | rtial monosor       | 20.99              | yes         | 10.9548      |
| MU63                   | 51.95        | female | left  | on equator               | 23             | 15                   | mixed           | no                 | no                       | disomy              | 95.47              | no          | 10.4232      |
| MU14                   | 70.09        | male   | right | on equator               | 13             | 13.8                 | mixed           | yes                | no                       | monosomy            | 7.92               | yes         | 10.0871      |
| MU129                  | 28.56        | female | left  | on equator               | 17             | 13                   | mixed           | no                 | NA                       | disomy              | 90.02              | no          | 9.66282      |
| MU13                   | 32.94        | male   | right | on equator               | 15             | 10.1                 | mixed           | no                 | no                       | disomy              | 55.23              | no          | 9.43508      |
| MU85                   | 69.09        | male   | right | all over the eye         | 21             | 14                   | mixed           | yes                | NA                       | NA                  | 7.06               | yes         | 9.40896      |
| MU64                   | 59.41        | male   | left  | posterior to equator     | NA             | 12                   | NA              | no                 | no                       | monosomy            | 25.13              | no          | 8.70116      |
| MU218                  | 73.13        | male   | right | on equator               | NA             | 13                   | NA              | NA                 | no                       | monosomy            | 7.59               | yes         | 8.58265      |
| MU48                   | 51.61        | female | left  | on equator               | 12             | 10.5                 | epithelioid     | no                 | no                       | monosomy            | 21.78              | yes         | 7.90258      |
| MU153                  | 77.95        | female | right | on equator               | 16             | 11.7                 | epithelioid     | no                 | no                       | monosomy            | 18.96              | yes         | 7.60776      |
| MU132                  | 72.82        | male   | left  | on equator               | 20             | 14                   | mixed           | no                 | no                       | disomy              | 70.14              | no          | 6.70883      |
| MU217                  | 65.72        | female | left  | on equator               | 20             | 14                   | mixed           | no                 | no                       | monosomy            | 44.39              | yes         | 6.35748      |
| MU88                   | 40.41        | female | left  | on equator               | 15             | 11.4                 | NA              | yes                | no                       | monosomy            | 28.88              | yes         | 5.50691      |
| MU205                  | 68.36        | male   | right | on equator               | 17             | 11.5                 | mixed           | no                 | yes                      | disomy              | 35.55              | yes         | 4.26394      |
| <b>Average</b>         | <b>60.64</b> |        |       | <b>0.39</b>              | <b>15.98</b>   | <b>11.80</b>         | <b>0.68</b>     | <b>0.56</b>        | <b>0.06</b>              | <b>0.53</b>         | <b>48.26</b>       | <b>0.43</b> | <b>15.71</b> |

Note: For quantitative analysis purpose, all the descriptive characteristics are assigned arbitrary numbers such as '1' for 'yes' while '0' for 'no'. For tumor location, any 'anterior'-related for '1', any 'posterior'-related for '0', and 'on equator' for '0.5'. For tumor cell type, '1' for 'epithelioid', '0.5' for 'mixed', '0' for 'spindle'. For chromosome 3 status, 'monosomy' for '1', 'partial monosomy' for '0.5', 'disomy' for '0'. 'NA' is not counted. For metastasis, '1' for 'yes' and '0' for 'no'.

**Supplemental Table 5. Indices of UM cell-grafted tumor malignancy.** Intravitreal injection of the indicated UM cell lines into both eyes of two athymic nude mice for 25 days when euthanized, the enucleated eyes and the liver tissues were fixed, paraffin-embedded, and sectioned at 10  $\mu$ m for tumor property evaluation upon H&E staining. Arbitrary scale numbers from 0 to 3 for tumor size, for example, no tumor is '0', small tumor is '1' only seen by an ophthalmoscope, medium size tumor is '2' already visible but still within the eye socket, big tumor is '3' already out of the eye socket. The numbers 0, 0.5, and 1 for tissue invasion and metastasis are given to denote the severity of the grafted tumors.

| Graft #          | Tissue | Tumor size |        |       |    | Invasion |      |        | Metastasis |          |    |
|------------------|--------|------------|--------|-------|----|----------|------|--------|------------|----------|----|
|                  |        | Big        | Medium | Small | No | Retina   | Lens | Sclera | Yes        | Possible | No |
| OCM1-vector #495 | OS     |            | 2      |       |    | 1        | 1    | 0      |            |          |    |
|                  | OD     |            | 2      |       |    | 1        | 1    | 0      |            |          |    |
|                  | Liver  |            |        |       |    |          |      |        |            |          | 0  |
| OCM1-vector #494 | OS     |            | 2      |       |    | 0.5      | 0.5  | 0      |            |          |    |
|                  | OD     |            | 2      |       |    | 0.5      | 0.5  | 0      |            |          |    |
|                  | Liver  |            |        |       |    |          |      |        |            |          | 0  |
| AVG              |        | 2          |        |       |    | 0.5      |      |        | 0          |          |    |
| STD              |        | 0          |        |       |    | 0.43     |      |        | 0          |          |    |
| OCM1-ZEB1sh #488 | OS     |            |        |       | 0  | 0        | 0    | 0      |            |          |    |
|                  | OD     |            |        | 1     |    | 0        | 0    | 0      |            |          |    |
|                  | Liver  |            |        |       |    |          |      |        |            |          | 0  |
| OCM1-ZEB1sh #489 | OS     |            |        | 1     |    | 0        | 0    | 0      |            |          |    |
|                  | OD     |            |        | 1     |    | 0        | 0    | 0      |            |          |    |
|                  | Liver  |            |        |       |    |          |      |        |            |          | 0  |
| AVG              |        | 0.75       |        |       |    | 0        |      |        | 0          |          |    |
| STD              |        | 0.5        |        |       |    | 0        |      |        | 0          |          |    |
| C918-vector #491 | OS     | 3          |        |       |    | 1        | 1    | 1      |            |          |    |
|                  | OD     | 3          |        |       |    | 1        | 1    | 1      |            |          |    |
|                  | Liver  |            |        |       |    |          |      |        |            | 0.5      |    |
| C918-vector #490 | OS     |            | 2      |       |    | 1        | 1    | 1      |            |          |    |
|                  | OD     |            | 2      |       |    | 1        | 1    | 1      |            |          |    |
|                  | Liver  |            |        |       |    |          |      |        |            | 0.5      |    |
| AVG              |        | 2.5        |        |       |    | 1        |      |        | 0.5        |          |    |
| STD              |        | 0.58       |        |       |    | 0        |      |        | 0          |          |    |
| C918-ZEB1sh #492 | OS     |            | 2      |       |    | 0.5      | 0.5  | 0      |            |          |    |
|                  | OD     |            |        | 1     |    | 0.5      | 0.5  | 0      |            |          |    |
|                  | Liver  |            |        |       |    |          |      |        |            | 0.5      |    |
| C918-ZEB1sh #493 | OS     |            | 2      |       |    | 1        | 1    | 1      |            |          |    |
|                  | OD     |            | 2      |       |    | 1        | 1    | 1      |            |          |    |
|                  | Liver  |            |        |       |    |          |      |        |            |          | 0  |
| AVG              |        | 1.75       |        |       |    | 0.67     |      |        | 0.25       |          |    |
| STD              |        | 0.5        |        |       |    | 0.39     |      |        | 0.35       |          |    |

Note: OS=left eye; OD=right eye; AVG=Average; STD=standard deviation.

**Supplemental Table 6. Patients' information associated with the GSE44299 data set**

| UM#                    | Gender | Survive (d)    | Death       | Metastasis  | ZEB1        |
|------------------------|--------|----------------|-------------|-------------|-------------|
| <b>ZEB1 high group</b> |        |                |             |             |             |
| UM 26                  | m      | 2041           | 0           | 0           | 13.5542     |
| UM 8                   | f      | 457            | 1           | 1           | 7.615825    |
| UM 25                  | m      | 562            | 1           | 1           | 7.562569    |
| UM 45                  | m      | 1151           | 1           | 1           | 7.271459    |
| UM 61                  | m      | 1126           | 0           | 0           | 6.723591    |
| UM 32                  | f      | 2284           | 0           | 0           | 6.071536    |
| UM 22                  | m      | 792            | 1           | 1           | 5.395182    |
| UM 7                   | m      | 1644           | 0           | 0           | 5.078291    |
| UM 33                  | m      | 2952           | 0           | 0           | 4.198076    |
| UM 37                  | m      | 943            | 1           | 1           | 3.890266    |
| UM 54                  | f      | 822            | 1           | 1           | 3.861673    |
| UM 58                  | f      | 1218           | 0           | 0           | 3.400497    |
| UM 28                  | f      | 1186           | 1           | 1           | 3.399544    |
| UM 63                  | m      | 668            | 1           | 1           | 2.66079     |
| UM 24                  | f      | 1157           | 1           | 1           | 2.295758    |
| UM 6                   | m      | 731            | 1           | 1           | 1.963174    |
| UM 41                  | f      | 342            | 1           | 1           | 1.49318     |
| UM 27                  | m      | 822            | 1           | 1           | 1.301496    |
| <b>Average</b>         |        | <b>1161.00</b> | <b>0.67</b> | <b>0.67</b> | <b>4.87</b> |
| <b>ZEB1 low group</b>  |        |                |             |             |             |
| UM 20                  | f      | 1614           | 0           | 0           | 1.016303    |
| UM 30                  | f      | 1491           | 0           | 0           | 0.858666    |
| UM 64                  | f      | 945            | 0           | 0           | 0.745469    |
| UM 40                  | m      | 1003           | 1           | 1           | 0.514446    |
| UM 59                  | m      | 1218           | 0           | 0           | 0.323337    |
| UM 51                  | f      | 1310           | 0           | 0           | 0.297591    |
| UM 12                  | m      | 2284           | 0           | 0           | 0.243418    |
| UM 56                  | m      | 1218           | 0           | 0           | 0.222075    |
| UM 19                  | f      | 1766           | 0           | 0           | 0.125164    |
| UM 60                  | m      | 488            | 1           | 1           | 0.002033    |
| UM 1                   | m      | 547            | 1           | 1           | n.d.        |
| UM 3                   | m      | 2799           | 0           | 0           | n.d.        |
| UM 4                   | m      | 548            | 1           | 1           | n.d.        |
| UM 9                   | m      | 60             | 1           | 1           | n.d.        |
| UM 10                  | f      | 457            | 0           | 0           | n.d.        |
| UM 13                  | m      | 1796           | 0           | 0           | n.d.        |
| UM 15                  | f      | 518            | 0           | 0           | n.d.        |
| UM 16                  | m      | 975            | 1           | 1           | n.d.        |
| UM 17                  | f      | 1278           | 1           | 1           | n.d.        |
| UM 18                  | m      | 2434           | 0           | 0           | n.d.        |
| UM 21                  | f      | 1583           | 0           | 0           | n.d.        |
| UM 29                  | f      | 1614           | 0           | 0           | n.d.        |
| UM 31                  | f      | 791            | 1           | 1           | n.d.        |
| UM 34                  | m      | 365            | 1           | 1           | n.d.        |
| UM 36                  | m      | 26             | 1           | 1           | n.d.        |
| UM 38                  | m      | 3105           | 0           | 0           | n.d.        |
| UM 39                  | f      | 2782           | 0           | 0           | n.d.        |
| UM 42                  | m      | 1413           | 0           | 0           | n.d.        |
| UM 44                  | m      | 1192           | 1           | 1           | n.d.        |
| UM 46                  | m      | 1338           | 0           | 0           | n.d.        |
| UM 48                  | f      | 995            | 1           | 1           | n.d.        |
| UM 50                  | m      | 699            | 0           | 0           | n.d.        |
| UM 52                  | f      | 820            | 0           | 0           | n.d.        |
| UM 53                  | m      | 1553           | 0           | 0           | n.d.        |
| UM 55                  | f      | 1249           | 0           | 0           | n.d.        |
| UM 57                  | f      | 1188           | 0           | 0           | n.d.        |
| UM 62                  | f      | 1035           | 0           | 0           | n.d.        |
| <b>Average</b>         |        | <b>1256.68</b> | <b>0.32</b> | <b>0.32</b> | <b>0.43</b> |
